1 Distinct chemotactic behavior in the original  
2 *Escherichia coli* K-12 depending on  
3 forward-and-backward swimming, not on  
4 run-tumble movements

5 Yoshiaki Kinoshita<sup>1,2</sup>, Tsubasa Ishida<sup>3</sup>, Myu Yoshida<sup>3</sup>, Rie Ito<sup>3</sup>,  
6 Yusuke V. Morimoto<sup>4</sup>, Kazuki Goto<sup>1</sup>, Richard M. Berry<sup>2</sup>,  
7 Takayuki Nishizaka<sup>1</sup> & Yoshiyuki Sowa<sup>3</sup>

8 <sup>1</sup>Department of Physics, Gakushuin University, 1-5-1 Mejiro, Toshima-ku, Tokyo  
9 171-8588, Japan.

10 <sup>2</sup>Department of Physics, University of Oxford, Park road OX1 3PU, Oxford, UK

11 <sup>3</sup>Department of Frontier Bioscience and Research Center for Micro-Nano Technology,  
12 Hosei University, Tokyo 184-8584, Japan

13 <sup>4</sup>Department of Physics and Information Technology, Faculty of Computer Science and  
14 Systems Engineering, Kyushu Institute of Technology, Iizuka, Fukuoka, Japan

15 Correspondence should be addressed to [yoshiaki.kinoshita@gmail.com](mailto:yoshiaki.kinoshita@gmail.com) or  
16 [ysowa@hosei.ac.jp](mailto:ysowa@hosei.ac.jp)

17

18

19 **Abstract**

20 Most motile bacteria are propelled by rigid, helical, flagellar filaments and display  
21 distinct swimming patterns to explore their favorable environments. *Escherichia coli*  
22 cells have a reversible rotary motor at the base of each filament. They exhibit a  
23 run-tumble swimming pattern, driven by switching of rotatory direction which causes  
24 polymorphic flagellar transformation. Here we report a novel swimming mode in *E. coli*  
25 ATCC10798, which is one of the original K-12 clones. High-speed tracking of single  
26 ATCC10798 cells showed forward and backward swimming with an average turning  
27 angle of 150°. The flagellar helicity remained right-handed with a 1.3 µm pitch and 0.14  
28 µm helix radius, which is assumed to be a curly type, regardless of motor switching; the  
29 flagella of ATCC10798 did not show polymorphic transformation. The torque and  
30 rotational switching of the motor was almost identical to the *E. coli* W3110 strain,  
31 which is a derivative of K-12 and a wild-type for chemotaxis. The single point mutation  
32 of N87K in FliC, one of the filament subunits, is critical to the change in flagellar  
33 morphology and swimming pattern, and lack of flagellar polymorphism. *E. coli* cells  
34 expressing FliC(N87K) sensed ascending a chemotactic gradient in liquid but did not  
35 form rings on a semi-solid surface. Based on these findings, we propose a flagellar  
36 polymorphism-dependent migration mechanism in structured environments.

## 37 **Introduction**

38 The flagellar motor is the most extensively investigated motility system in bacteria [1-3].  
39 The motor complex is composed of approximately 30 different proteins and is attached  
40 to the helical flagellar filament via a hook structure. Most flagellar motors rotate in both  
41 directions, and the rotating filament works as a screw to generate thrust against the  
42 surrounding medium [4, 5]. Flagellated bacteria exhibit distinct chemotactic behaviors  
43 to move toward favorable environments. An *E. coli* cell has 5-10 left-handed flagellar  
44 filaments protruding from its cell body, and the rotation of a bundle of multiple flagella,  
45 rotating in the counterclockwise (CCW) direction (when viewed from filament to  
46 motor), propels a cell forward [4, 6]. The cell undergoes reorientation (tumbling) upon  
47 switching of flagellar rotation from CCW to clockwise (CW), which leads to a change  
48 in filament shape from left- to right-handed [7]. *V. alginolyticus* cells form a single  
49 left-handed polar flagellum, whose CCW and CW rotation propels a cell forward and  
50 backward, respectively [8, 9]. Additionally, cells of *V. alginolyticus* change their  
51 swimming direction by  $\sim 90^\circ$  due to a buckling instability of their straight hook (flick).  
52 Recently, a novel type of chemotactic behavior has been discovered, where the  
53 right-handed flagellum wraps around the cell body and propels the cell forward by its  
54 CW rotation [10, 11].

55 *E. coli* is an ideal model organism, due to rapid growth in pure nutrient media and  
56 abundant genetic strains. Theodor Escherich, the German pediatrician, isolated  
57 *Bacterium coli* from the feces of healthy individuals in 1885, which was renamed  
58 *Bacillus coli* and eventually *E. coli* in 1919 [12]. The original *E. coli* strain has been  
59 stored in the United Kingdom National Collection of Type Cultures as NCTC86, which  
60 shares a common genetic backbone with non-pathogenic *E. coli*, such as K-12, B and

61 HS [12, 13]. In 1922, *E. coli* K-12 was isolated from the stool of a convalescent  
62 diphtheria patient [14]. Many hundreds of K-12 derivatives have been isolated for  
63 motility studies [15, 16], and K-12 has lost resistance to bacteriophage  $\lambda$  and sexual  
64 fertility ( $F^+$ ), from the effect of UV irradiation and acridine orange, during this period  
65 [14]. Initial studies isolated motile strains, such as W2637 and MG1655, using a  
66 semi-solid agar plate, in which motile strains formed a ring, but non-motile strains did  
67 not [17]. A recent study proposed a mechanism for navigated range expansion in *E. coli*  
68 cells, in a structured environment (semi-solid agar plate). It suggested a population  
69 fitness mechanism that recognizes nutrients and chemical gradients, which serve as a  
70 local guide and allow rapid expansion into unoccupied territories (outer edge) [18].  
71 However, the reason why the original K-12 strain exhibits no motility remains unclear,  
72 and we infer that these non-motile cells have uncharacterized and exciting features to  
73 contribute to the field of bacterial flagellar studies.

74 To investigate further, we checked the swimming motility of the original K-12 strain,  
75 ATCC10798. It did not show a swarm ring on a semi-solid agar plate but could swim, in  
76 liquid medium, with a forward and backward movement like *V. alginolyticus*. The  
77 FliC(N87K) substitution seems to have prevented flagellar polymorphism and a  
78 consequent change of chemotactic behavior from a run-tumble to forward-backward  
79 movements. We found that ATCC10798 cells could not swim in structured  
80 environments, although they could swim toward the attractant in liquids. On the other  
81 hand, *E. coli* cells which showed run and tumble strategy freely moved with  
82 180°-reversals to escape, if their route was blocked. From these results, we argue the  
83 importance of flagellar polymorphism for migration in structured environments.

84

## 85 **Material and Methods**

### 86 **Bacterial strains**

87 *E. coli* K-12 strain, ATCC10798 and W3110 were used in this study. Other mutants  
88 were listed in Supplementary Table 1. Cells were grown at 37 °C on 1.5 % (wt/vol) agar  
89 plate (010-08725; Wako) containing T-broth (1 % (wt/vol) Tryptone [Difco], 0.5%  
90 NaCl), and a single colony was isolated and resuspended to 10 ml volume of T-broth or  
91 LB (1 % (wt/vol) Tryptone [Difco], 0.5 % yeast extract [Difco], 0.5 % NaCl) liquid  
92 medium [7]. The cells were grown to an optical density of 0.4-0.7 at 600 nm with  
93 shaking at 30 °C (Supplementary Fig. 1).

### 94 **Construction of the *fliC* mutants**

95 Plasmids and primers used in this study were listed in Supplementary Table 2. We  
96 purified the genomic DNA of ATCC10798 and amplified the *fliC* gene by PCR. The  
97 sequence difference of the *fliC* gene between ATCC10798 and W3110 strains was only  
98 at 87 residues.

99 To check the effect of the point mutation of 87 residues on the flagellar morphology,  
100 we performed two independent experiments: (i) the complementation of  $\Delta fliC$  strain  
101 with the plasmid encoding FliC(N87K); (ii) the replacement of chromosomal *fliC* gene  
102 of ATCC10798 strain with the *E. coli* wild-type FliC. The plasmid encoding  
103 FliC(N87K) was constructed based on pYS10 encoding wild-type FliC. The mutation in  
104 *fliC* was generated by the “QuikChange” site-directed mutagenesis method using  
105 1217\_ *fliC*(N87K)-f(QC) and 1218\_ *fliC*(N87K)-r(QC) listed in Supplementary table 2.  
106 The mutation was confirmed by DNA sequence analysis.

107 The strain was constructed using a  $\lambda$  Red recombination system with plasmid pKD46  
108 encoding the Red system [19] and positive selection for the loss of tetracycline

109 resistance [20]. The selectable tetracycline-resistance gene *tetRA* was amplified by PCR  
110 using primers of 0196\_fliC-tetRA-F and 0197\_fliC-tetRA-R listed in Supplementary  
111 Table 2. The *tetRA* cassette was replaced in the chromosomal *fliC* locus of the  
112 ATCC10798. After selection and isolation, SHU101 [*fliC*(N87K)::*tetRA*] was obtained  
113 and confirmed by colony PCR using 0219\_fliC-(-175)-F, 0220\_fliC-(+250)-R ,  
114 0210\_tetRA-785-R and 0211\_tetRA-1090-F (Supplementary Fig. 2). *tetRA* of SHU101  
115 was replaced by the wild-type *fliC* of chemotactic wild-type strain RP437 amplified by  
116 PCR using primers of 1232\_fliC-F and 0199\_fliC-R. Tetracycline-sensitive clones were  
117 selected using tetracycline-sensitive plate and isolated as SHU102 [*fliC*(N87K)::*fliC*].  
118 The strain construction was confirmed by sequence analysis using 0219\_fliC- (-175)-F,  
119 0220\_fliC- (+250)-R, 0198\_fliC-F and 0199\_fliC-R.

#### 120 **Preparation of fluorescent-labeled cells**

121 1ml of cultivated cells were collected by centrifugation at 6,000 ×g for 4 min at 25 °C,  
122 resuspended to buffer A (30 mM NaCl, 70 mM KCl, 2 mM EDTA) at pH 7.8 containing  
123 Biotin-NHS-ester (Dojindo), and incubated for 15 min at room temperature. After  
124 labeling, two rounds of centrifugation above mentioned removed excess biotin.  
125 Biotinylated cells were resuspended into buffer (30 mM NaCl, 70 mM KCl, 5 mM  
126 MgCl<sub>2</sub>) at pH 7.0 containing 0.1 mg/ml Cy3-conjugated streptavidin and incubated for 3  
127 min [21, 22]. Two rounds of centrifugation removed excess dyes, and then cells were  
128 resuspended into buffer B.

#### 129 **Electron microscopy**

130 Carbon-coated electron microscope grids were glow-discharged with a hydrophilic  
131 treatment device (PIB-10; Vacuum Device) [10, 22]. Cells in buffer B were placed on

132 the grid and incubated for 10 min at room temperature. Cells were chemically fixed  
133 with 2 % (vol/vol) glutaraldehyde in buffer B for 15 min. Cells were washed three times  
134 with buffer B and subsequently treated by 2 % (wt/vol) ammonium molybdate for  
135 staining. Samples were observed under a TEM (JEM-1400; JEOL) at 100 kV. Whole  
136 images were captured by a CCD camera as 8 bits.

### 137 **Motility assay on soft-agar plates**

138 A single colony was inoculated on a semi-solid agar plate (0.25 % (wt/vol) T-broth  
139 soft-agar plates (214010; Difco)) and was incubated at 30°C for 7 hours. Ability of cell  
140 motility was evaluated from a colony's diameter by Image J 1.45s  
141 (<http://rsb.info.nih.gov/ij/>).

### 142 **Motility assay**

143 All experiments were performed at room temperature. The flow chamber was composed  
144 of two coverslips (no. 1, 0.12–0.17 mm thickness, Matsunami Glass) with different  
145 sizes (18 × 18 and 24 × 36 mm) [23, 24]. The 24×36 mm cover glass was  
146 glow-discharged with a hydrophilic treatment device (PIB-10; Vacuum Device) to clean  
147 its surface. Two pieces of double-sided tape, cut to a length of ~30 mm, were used as  
148 spacers between coverslips. Two tapes were fixed with a ~5 mm interval, and the final  
149 volume was ~7 µl, indicating that the thickness of double-sided tape was ~90 µm. In  
150 swimming assay, buffer C (30 mM NaCl, 70 mM KCl, 5 mM MgCl<sub>2</sub>, 5 mg/ml bovine  
151 serum albumin (BSA) [Sigma Aldrich]) was infused into the flow chamber, and then  
152 with 10 µl of the cell-suspension medium.

153 For observation of stuck cells under a total internal reflection fluorescence microscopy  
154 (TIRFM), a glass was coated with poly-L-lysine (F8920; Sigma Aldrich). Cells in buffer

155 D (30 mM NaCl, 70 mM KCl, 5 mM MgCl<sub>2</sub>, 1.5 mg/ml BSA) were infused into the  
156 chamber, and then a 20 µl volume of buffer D was infused to remove unbound cells.

157 A capillary assay was performed with a method by Niikata et al [25]. We used a 10-µl  
158 tip as capillary, which contains 5-µl buffer B with 1 % (wt/vol) agarose. The tip was  
159 inserted into a chamber for a chemotactic response assay (Supplementary Fig. 6). Buffer  
160 C was infused into a chamber to prevent cells adhering to the glass surface.

161 For a tethered-cell assay, cell suspension with an optical density of around 0.6-0.8 at  
162 600 nm was sheared by passing it back and forth 35 times between 1-ml syringes  
163 equipped with two 26-gauge needles connected by a piece of tubing. Cells were  
164 collected by centrifugation at 6,000 ×g for 2 min at 25 °C, resuspended to buffer E (10  
165 mM KPi, 85 mM NaCl, 0.1 mM EDTA). After two rounds of washing, cells were  
166 resuspended into buffer E. Cells were stuck on a glass surface via an anti-FliC antibody  
167 with a 1: 300 dilution (Fig. 3a), and unbound cells were washed by buffer F (10 mM  
168 KPi, 67 mM NaCl, 0.1 mM EDTA, 10 mM lactate). Spinning cells were captured using  
169 a CMOS camera at 60 frames s<sup>-1</sup> for 10 sec thorough 40× objective, as previously  
170 described [5, 26]. Rotational motions of cell bodies were analyzed using custom  
171 software based upon LabVIEW (National Instruments). The CW bias was defined as  
172  $\frac{\text{CW time}}{\text{total time}}$  (Fig. 3c).

### 173 **Microscopy**

174 For visualization of fluorescent-labeled cells, a green laser beam (wavelength of 532  
175 nm; Compass-315M-100, Coherent) was introduced into an inverted microscope (IX71,  
176 Olympus) equipped with a ×100 objective (Plan Apo TIRF, NA 1.49, Nikon  
177 Instruments), a dichroic mirror (custom-made, Chroma), an emission filter (NF01-532U,



178 Semrock), an EMCCD camera (iXon+ DU860, Andor), a CCD camera (HR1540;  
179 Digimo), a highly stable customized stage (Chukousha) and an optical table (RS-2000,  
180 Newport). Images were recorded at 2.5-ms intervals, using an EMCCD camera with a  
181 magnification of  $130 \times 130 \text{ nm}^2$  at the single pixel on the camera plate.

## 182 **Live-cell imaging on agarose**

183 We conducted two independent experiments to investigate a swimming motility on a  
184 0.2 % semi-solid agarose. First, we introduced 20 ml of 0.2 % agarose into a 4.4 cm  
185 radius of the Petri dish, inoculated a single-colony onto the agarose, and then incubated  
186 cells for 7 h at  $30^\circ\text{C}$  (Fig. 5a and b). Second, we introduced 20  $\mu\text{l}$  of 0.2 % agarose onto  
187 a slide glass, wait until the agarose was solidified, and then put 10  $\mu\text{l}$  of culture on it.  
188 The agarose pad was covered with a  $22 \times 22$  coverslip using a double-sided tape with a  $\sim$   
189 20 mm interval, and the approximate height is 75  $\mu\text{m}$ , (Fig. 5c and d). W3110 cells near  
190 the bottom glass surface were observed to guarantee a swimming motility in agarose  
191 environments. Both experiments were carried using an upright microscope (Eclipse Ci;  
192 Nikon) equipped with a  $40\times$  objective (EC Plan-Neofluar 40 with Ph and 0.75 N.A.;  
193 Nikon), a CMOS camera (H1540; Digimo). Images were recorded at 20 fps for 15 sec.

## 194 **Data analysis**

195 To identify reorientation events from trajectories, we used three strategies, as previously  
196 reported [27]. First, phase-contrast images were captured at up to 200 frames  $\text{s}^{-1}$ . The  
197 centroid positions of cells determined swimming trajectories. Given the trajectory of  
198 cells,  $\mathbf{r}(t) = [x(t), y(t)]$ , the swimming velocity  $\mathbf{v}(t)$  was defined as  $\mathbf{v}(t) = \frac{\mathbf{r}(t + \Delta t) - \mathbf{r}(t)}{\Delta t}$ .  
199 Second, to eliminate the effect of noise, such as Brownian motion, on reorientation  
200 events, we smoothed the data by calculating running averages over 10 points, which

201 corresponded to 50-ms intervals. Finally, given the two data points,  $\mathbf{r}(t) = [x(t), y(t)]$   
202 and  $\mathbf{r}(t + \Delta t) = [x(t + \Delta t), y(t + \Delta t)]$ , we defined the angle against the horizontal axis as  $\theta$   
203 ( $t$ ). If the two successive angle changes,  $\theta(t_1) - \theta(t_0)$  and  $\theta(t_2) - \theta(t_1)$  were over  $\alpha$ , that point  
204 was identified as the end of the run. A new run begins at three successive angle changes  
205  $< \alpha$  with the speed of more  $5 \mu\text{m s}^{-1}$ ; hence, the minimum duration of run was 80 ms.  
206 The threshold  $\alpha$  is described as the following equation:  $\alpha = c \Delta\theta_{\text{med}}$ , where  $c$  the  
207 coefficient and  $\Delta\theta_{\text{med}}$  the median directional change. We manually checked the trace and  
208 video to avoid the detection of false events and found that the best value of  $c$  is 3.

209 Under fluorescent-labeled cell experiments, we constructed a kymograph at 2.5-ms  
210 intervals, as shown in Figures 2 to measure the swimming speed. The flagellar rotation  
211 rate of each cell was measured by Fourier transform analysis (Fig. 2c *right*). Under  
212 TIRF illumination, intensity changes were detected when fluorescent-labeled flagella  
213 made contact with an evanescent field. Intensity changes in a  $2 \times 2$  pixel grid were  
214 measured and calculated by fast Fourier transform analysis [21, 22].

215

216

217

## 218 **Results**

### 219 **Differences in swimming pattern and flagellar structure between *E. coli*** 220 **ATCC10798 and W3110**

221 We found that ATCC10798 cells did not form a swarm ring on the semi-solid agar plate,  
222 while W3110 cells were able to do so (Fig. 1a). Previous studies reported that cells  
223 defective in chemotaxis, motility or lacking active flagella did not form a ring on the  
224 semi-solid agar plate (Supplementary Fig. 2) [28]; therefore, it was conceivable that  
225 ATCC10798 cells would be unable to exhibit swimming or switching behavior. To  
226 address this, we performed microscopic measurement using a phase-contrast  
227 microscope (Supplementary Video 1). Unexpectedly, ATCC10798 cells showed  
228 swimming motility with reorientations, which is a different motility pattern to W3110  
229 cells (Fig. 1b).

230 To better understand the different motility modes between strains, we quantified the  
231 swimming speed and switching pattern of cells. The average swimming speed  $\pm$   
232 standard deviation (SD) was  $13.2 \pm 4.4 \mu\text{m s}^{-1}$  in ATCC10798 cells and  $32.5 \pm 6.6 \mu\text{m}$   
233  $\text{s}^{-1}$  in W3110 cells (Fig. 1c). To characterize the switching behaviors in detail, we  
234 extracted angle changes between  $\theta(t)$  and  $\theta(t + \Delta t)$  from an algorithm based on previous  
235 studies (see Material and Methods section) [27]. The frequency distribution of turning  
236 angle in ATCC10798 has a bimodal shape, with peaks at  $70^\circ$  and  $150^\circ$ . This indicates  
237 that cells reversed their swimming directions (Fig. 1d *top*), which was previously  
238 reported in *Salmonella enterica serovar*, a curly mutant of *S. typhimurium* [29]. The  
239 most frequent angles for changes of direction in W3110 cells were approximately  $35^\circ$ ,  
240 which was similar to the angle previously reported (Fig. 1d *bottom*) [27].

241 Next, we analyzed flagellar morphology using TEM. In ATCC10798, the average

242 number of filaments was two, and the average length  $\pm$  SD was  $4.7 \pm 1.1 \mu\text{m}$  (Fig 1e *top*,  
243  $n = 62$ ). The flagellar pitch and helix radius were measured to be  $1.3 \pm 0.2 \mu\text{m}$  (Fig. 1f  
244 *top*) and  $0.14 \pm 0.03 \mu\text{m}$  (Fig. 1g *top*), respectively, which corresponded to the curly  
245 flagellar filament [30]. In W3110, cells formed approximately six flagellar filaments  
246 around the cell body (peritrichous flagella, Fig. 1e *bottom*). Their average length  $\pm$  SD  
247 was  $7.3 \pm 1.9 \mu\text{m}$  ( $n = 48$ ), and their pitch and helix radius were measured as  $3.0 \pm 0.2$   
248  $\mu\text{m}$  (Fig. 1f *bottom*) and  $0.23 \pm 0.05 \mu\text{m}$  (Fig. 1g *bottom*), respectively. These helical  
249 parameters indicated that this flagellar filament belongs to the normal type [30]. Other  
250 structural parameters are summarized in Supplementary Table 3.

### 251 **Forward-backward movement in ATCC10798 swimming**

252 To elucidate the basis for the difference in the swimming mode between ATCC10798  
253 and W3110, we labeled the flagellar filaments with a fluorescent dye, Cy3, taking  
254 advantage of biotin-avidin interaction (see Material and Methods) [21, 22]. First, we  
255 observed the flagellar dynamics in a large field ( $230 \mu\text{m} \times 144 \mu\text{m}$ ). ATCC10798 cells,  
256 with few flagellar filaments, frequently exhibited forward and backward swimming,  
257 like *Vibrio alginolyticus* [8, 9], whereas cells with many filaments showed wobbling  
258 motion, apparently due to deficient bundle formation (Supplementary Video 2). Most  
259 W3110 cells exhibited directed linear motion (run) with abrupt directional changes  
260 (tumble) [6, 27].

261 We next observed the swimming speed and flagellar rotation rate simultaneously with  
262 a high S/N ratio at  $400 \text{ frame s}^{-1}$  (Supplementary Video 3) [21, 22]. Using a kymograph  
263 analysis (see Material and Methods), the swimming speeds and rotational rates were  
264 quantified from the slope and the changes in intensity, respectively (Fig. 2a-c). In  
265 ATCC10798, the swimming speed and rotation rate were estimated to be  $9.1 \pm 4.1 \mu\text{m}$

266  $s^{-1} / 107.2 \pm 29.1$  Hz during backward swimming (Fig. 2a *left*, Fig. 2d and e *top*) and 8.7  
267  $\pm 4.7 \mu\text{m s}^{-1} / 98.4 \pm 15.7$  Hz during forward swimming (Fig. 2a *right*, Fig. 2d and e  
268 *middle*). In W3110 (Fig. 2b), these parameters were  $17.9 \pm 6.9 \mu\text{m s}^{-1}$  and  $115.1 \pm 28.1$   
269 Hz (Fig. 2d and e *bottom*). Despite similar values of rotational rates between the two  
270 strains, flagellar rotation in W3110 cells was approximately twice as efficient: the ratio  
271 of swimming speed ( $v$ ) / rotation rate ( $f$ ) was  $0.156 \mu\text{m/rotation}$  while that of  
272 ATCC10798 was  $0.083 \mu\text{m/rotation}$  during backward swimming and  $0.097 \mu\text{m/rotation}$   
273 during forward swimming (Fig. 2f). This result suggests that the larger helix can  
274 produce a stronger thrust, as previously predicted by mathematical modelling [31].

## 275 **Real-time imaging of structure and kinematics for flagellar filaments, under** 276 **TIRFM**

277 We next determined flagellar structure and function, simultaneously, using TIRFM [10,  
278 21, 22]. We found that a cell attached to the glass surface can rotate its flagellar filament  
279 freely, by treating coverslips with poly-L-lysine and BSA. In ATCC10798, we could see  
280 wave propagation, away from the cell body, during CW rotation of right-handed  
281 flagellar filaments, and towards the cell body during CCW rotation (Supplementary  
282 Video 4). From this analysis, we conclude that forward and backward movements in  
283 ATCC10798 cells are driven by CW and CCW rotation, respectively, for a right-handed  
284 flagellar filament. We summarized the flagellar morphology and rotation rate in both  
285 modes in Supplementary Fig. 3.

286 Although ATCC10798 cells had only right-handed flagellar filaments, W3110 cells  
287 had both right- and left-handed flagellar filaments (Supplementary Video 5). W3110  
288 cells mainly formed left-handed flagellar helices when the filaments freely rotated in the  
289 CCW direction. The motor switching caused the gyration of the filament and

290 transformation from the left-handed into right-handed filament within 100 ms  
291 (Supplementary Fig. 4 *left* and Supplementary Video 6). We also detected this  
292 reversible transformation from right- to left-handed (Supplementary Fig. 4 *right* and  
293 Supplementary Video 7). Furthermore, we observed coiled-state flagellar filaments with  
294 a radius of  $0.78 \pm 0.02 \mu\text{m}$  in W3110 (Supplementary Fig. 5).

### 295 **Quantification of single motor behaviors by tethered-cell assay**

296 Previous studies claimed to identify torque-dependent flagellar transformation, based on  
297 direct measurement using a dark-field microscopy and molecular simulation [32, 33].  
298 However, we could not detect the flagellar transformation in ATCC10798 experiments,  
299 suggesting that the motor torque might be insufficient to cause flagellar transformation.  
300 To address this point, we quantified the motor properties using a tethered-cell assay (Fig.  
301 3a, see Material and Methods). We recorded the rotation for 10 seconds in each  
302 measurement. The switching frequency and CW bias (CW time/total time) were  $1.15 \pm$   
303  $0.60 \text{ s}^{-1}$  and  $0.61 \pm 0.21$ , respectively, in ATCC10798; and  $1.52 \pm 0.84 \text{ s}^{-1}$  and  $0.48 \pm$   
304  $0.27$  in the W3110 (Fig. 3b and c). The rotation rates of ATCC10798 and W3110 were  
305  $7.3 \pm 1.4 \text{ Hz}$  and  $7.0 \pm 1.3 \text{ Hz}$ , respectively (Fig. 3d). We could not detect any difference  
306 in the motor speed between two strains ( $P = 0.1864 > 0.05$  by *t*-test), suggesting that the  
307 defective flagellar polymorphism of ATCC10798 is not caused by its motor properties.

### 308 **Single-point mutation FliC(N87K) is essential for forward-backward movement**

309 A bistable protofilament model explains the polymorphic flagellar transition. The  
310 flagellar filament is composed of 11 protofilaments, each of which assumes either a left-  
311 or right type, and this mixture of two types of protofilament produces several filament  
312 shapes, such as a normal, semi-coiled, and curly [34-36]. Additionally, it is known that

313 some point mutations can lead to formation of these left- and right type protofilaments  
314 [37-39]. Therefore, we compared the *fliC* between ATCC10798 and W3110, and found  
315 that residue 87 of FliC in ATCC10798 was changed from asparagine to lysine (Fig. 4a).  
316 The effect of amino acid substitutions on polymorphic flagellar transformation is well  
317 studied, but the effect of this substitution on flagellar formation has never been  
318 investigated, to our knowledge.

319 To check whether this substitution was truly responsible for the transformation from a  
320 left-handed to right-handed flagellar filament, we replaced the *fliC* gene of ATCC10798  
321 with a wild type one, SHU102 [ATCC10798(*fliC*(N87K)::*fliC*)] (see Material and  
322 Methods). We first examined the flagellar morphology using TEM (Fig. 4b). The pitch  
323 and helical radius of SHU102 flagella were  $2.5 \pm 0.2 \mu\text{m}$  (Fig. 4c *top*) and  $0.20 \pm 0.04$   
324  $\mu\text{m}$  (Fig. 4c *bottom*), respectively, which corresponded to the normal flagellar type, as  
325 observed in W3110 (Fig. 1f and g *bottom*). We next investigated the swimming motility  
326 of SHU102. SHU102 formed a swarm ring on the semi-solid agar plate; and its diameter  
327 was similar to that observed in W3110 (Fig. 4d). Additionally, SHU102 cells displayed  
328 run-and-tumble strategy in its chemotactic behavior (Supplementary Videos 8-9 and Fig.  
329 4e). Furthermore, we examined the effect of this substitution on chemotactic response,  
330 using a capillary (tip) assay, and found that FliC(N87K) substitution did not influence  
331 on it (Supplementary Video 10 and Supplementary Fig. 6). These results were  
332 confirmed independently by the experiment with  $\Delta$ *fliC* cells expressing FliC(N87K)  
333 (Supplementary Result 1).

334 We also examined the rotation rate and morphology of the flagellar filaments using  
335 TIRFM (Supplementary Fig. 7) and found that SHU102 cells had the left-handed  
336 flagellar filament. The flagellar helicity frequently underwent switching into a

337 right-handed form, depending on motor switching, which has never been observed in  
338 ATCC10798 cells (Supplementary Video 11). These results suggest that FliC(N87K)  
339 caused the structure of filaments to be fixed in a right-handed helicity.

340 **W3110 cells can escape from stuck on agarose surface through 180°-reverse**  
341 **movements**

342 Although ATCC10798 cells show chemotaxis in a liquid environment (Supplementary  
343 Fig. 6), they were not able to swim on semi-solid agar (Fig. 1). To examine the reason,  
344 we checked swimming motility using agarose. As with the agar experiment,  
345 ATCC10798 cells could not form a swarm ring on a 0.2 % agarose plate, but W3110  
346 cells could do so (Fig. 5a). Phase-contrast microscopy revealed that some W3110 cells  
347 were dispersed thinly to all areas (Fig. 5b (i) and (ii)), whereas ATCC10798 cells were  
348 more densely existed (Fig. 5b (iii)). To check this difference in detail, we observed the  
349 swimming motility of fresh cells using a 0.2 % semi-solid agarose pad (see Material and  
350 Methods). ATCC10798 cells were not able to swim once they stuck to the surface  
351 (Supplementary Video 12). On the other hand, W3110 cells frequently stuck to the  
352 surface but escaped via 180°-reversals, without reorientation of the cell body (Fig. 5d-f).  
353 Turner *et al* also observed the phenomenon using a fluorescent microscope: the flagellar  
354 bundle transformed from a normal to curly state, and the curly filaments formed a  
355 bundle that pushed the cell forward, in the opposite to the original direction of  
356 swimming. [40]. Additionally, we found that W3110 cells frequently reversed their  
357 swimming direction in the presence of 15 % (w/vol) Ficoll, as seen in constricted  
358 environments [41]; ATCC10798 cells were also able to swim with a forward and  
359 backward movement (Supplementary Video 13). Taken together, we conclude that  
360 flagellar polymorphism is one of the most crucial elements for migration in structured



361 environments (see details in Discussion).

362

363

## 364 **Discussion**

365 The FliC(N87K) substitution caused a flagellar transformation from the left-handed,  
366 normal flagellar filament into the right-handed, curly filament (Fig. 4). Flagellin  
367 monomer consists of four connected domains, D0-D3. The highly conserved D0 and D1  
368 domains face inward into a filament core, while D2 and D3 domains protrude outside,  
369 against the central core (Supplementary Fig. 11a) [42]. The role of D2-D3 is to stabilize  
370 flagellar filaments. D0-D1 are mainly responsible for the L/R switching of  
371 protofilaments [42-44]. In the flagellar filaments of *S. typhimurium*, (and *E. coli*), amino  
372 acid substitution of D1 domains at A49, D108, D152, A415 (A417), A428 (A430),  
373 N434 (N436) and A450 (A452) causes a flagellar transformation from normal to curly  
374 state [37-39, 45]. These substitutions change the hydrogen bonding network for the L/R  
375 transition along 5-, 11- and 16-start filament interfaces. We checked the interactions  
376 between subunits using L- and R-type straight filaments of *S. typhimurium* [42].  
377 Supplementary Fig. 11b highlighted their hydrogen bonding interactions. In the L-type  
378 filament, the E84 and E122 residues form multiple hydrogen bonds with the N439  
379 residue at 5-start interface. In the R-type filament, hydrogen bonds are formed between  
380 E84 and T438 and between T130 and N439 at 5-start interface. These residues are  
381 conserved among different bacterial species (Supplementary Fig. 11c). Although the  
382 specific interaction of the N87 residue was not detected in both L- and R- type subunits,  
383 the N87K mutation is likely to cause the formation of new hydrogen bonds with the  
384 T438 residue at 5-start interface. This hydrogen bond might enhance the R-type  
385 interaction and cause the adoption of the right-handed helical form, as previously shown  
386 [38].

387 On a semi-solid agar plate, W3110 cells could form a ring, but ATCC10798 cells could

388 not (Fig. 1). It is generally given that this ring formation is associated with chemotactic  
389 behavior, driven by a motor switching [28]. However, we infer that additional  
390 mechanisms are required for a ring formation, taking into consideration that  
391 ATCC10798 cells exhibit motor switching (Figs 2-3) and chemotactic behavior in liquid  
392 (Supplementary Fig. 6). Interestingly, W3110 cells exhibited 180°-reverse movements  
393 to escape from being stuck in a semi-solid agarose (Fig. 5), which is also observed in a  
394 peritrichous flagellated bacterium, *Bacillus subtilis* [46]. Turner *et al.* observed flagellar  
395 transformation-dependent 180° reversal movements using a fluorescent microscope (see  
396 Fig. 5 in [40]). This was only observed in structured environments [41, 46]. Considering  
397 that the flagellar morphology was stable, irrespective of motor switching  
398 (Supplementary Video 4), we propose a flagellar, polymorphism-dependent, migration  
399 mechanism in structured environments. Our proposal is supported by previous reports  
400 suggesting that a specific point mutation in FliC, which causes a lack of flagellar  
401 polymorphism, hinders the ability to swim on a semi-solid agar plate, but still allows  
402 movement in liquid media [37, 39].

403 We expect that the above model could also apply to other types of flagellated bacteria.  
404 Polar flagellated bacteria show flagellar polymorphic change from a normal to curly  
405 state in the single polar, flagellated species *Pseudomonas* spp, [47, 48] and from normal  
406 to coiled state for *Rhodobacter sphaeroides* [49]. A novel type of flagellar wrapping  
407 motion has recently been observed in the single polar, flagellated species *Shewanella*  
408 *putrefaciens* [11], multiple polar flagellated bacteria such as *Allivibrio fischeri*,  
409 *Burkholderia insecticola*, and *P. putida* [10, 50], and bipolar flagellated bacteria such as  
410 *Helicobacter suis* [51] and *Magnetospirillum magneticus* AMB-1 [52]. These bacteria  
411 reverse their direction of motion by the transition from CCW rotation of left-handed

412 normal filaments into CW rotation of right-handed coiled filaments to escape from  
413 being trapped in structured environments. In *S. putrefaciens*, *flaB* is crucial, not only for  
414 flagellar polymorphism, but also the transition from regular swimming to wrapping  
415 motion. However, only FlaA cells are deficient in both motility and flagellar  
416 polymorphism [53]. In common with *S. putrefaciens*, polar-flagellated bacteria possess  
417 multiple flagellins for flagellar polymorphism and migration in structured environments  
418 [54-56]. These data support our idea that the ability of bacteria to swim in structured  
419 environments is driven by flagellar polymorphism. However, *Caulobacter crescentus* and  
420 *V. alginolyticus*, form a swarm ring on a semi-solid agar plate without flagellar  
421 polymorphism [55, 57]. In these bacteria, the hydrodynamic load causes the buckling of  
422 the straight hook, upon the motor switching from CW to CCW rotation [8, 9, 58]. This  
423 buckling mechanism could be equivalent to the flagellar polymorphism, as a means to  
424 perturb cell motile pattern. In fact, the poly-hook mutant of non-chemotactic cells forms  
425 a pseudo ring, driven by dynamic flagellar reorientation [59, 60].

426 What is the advantage of ATCC10798 cells possessing the curly filament, even though  
427 they have a risk of getting stuck in structured environments? Amino acid residues 90-97  
428 in the N-terminal D1 domain of flagellin, conserved between  $\beta$ - and  $\gamma$ -proteobacteria,  
429 are essential to recognition by the innate immune receptors of host cells, known as  
430 “toll-like receptor 5” (TLR5) [61]. However, in  $\alpha$ - and  $\epsilon$ -proteobacteria, this amino acid  
431 sequence is altered, to escape from host recognition. These mutations abolish not only  
432 TLR5 recognition but also prevent motility on the semi-solid agar. Although the effect  
433 of the FliC(N87K) substitution on survival remains elusive, the alanine substitution  
434 FliC(L89A) does reduce TLR5 recognition by 50-60 % [62]. Because right-handed  
435 flagellar filaments could resist infection by bacteriophage  $\chi$  [63, 64], we speculate that

436 ATCC10798 cells have survived by the alteration of its flagellin sequence. An  
437 alternative theory is that cells without flagellar filaments are better at escaping detection  
438 by “predators”. However, antibacterial drugs also provide selective pressure for bacteria,  
439 in addition to phages and immune systems. To combat antibacterial drugs, it is known  
440 that some bacteria form biofilms. They attach to a surface, sticking to other bacteria via  
441 flagella and pili, then secrete extracellular polymeric substances, for homeostasis  
442 [65-67]. Considering that cells with curly filaments, unlike cells with normal flagellar  
443 filaments, easily adhere to one another [44] and aggregate in solution (Supplementary  
444 Fig. 6), we infer that ATCC10798 cells might have evolved curly filaments to support  
445 biofilm formation.

446 Taken together, we conclude that swarm ring formation corresponds to flagellar  
447 polymorphism and speculate that agar experiments fail to detect the motility of many  
448 cells. Our results complement recent, beautiful work on how microorganisms migrate in  
449 structured environments [18] and will lead to a discussion of how *E. coli* cells have  
450 adapted for survival through the evolution of flagellar transformation.

451

452

## 453 **Acknowledgements**

454 The authors thank Prof. Keiichi Namba for use of his PyMOL model, Prof. Ritsu  
455 Kamiya in preparing the manuscript of the early version and Prof. Ikuro  
456 Kawagishi for fruitful discussions. This study was supported in part by the JSPS  
457 Funding Program for Next-Generation World-Leading Researchers Grant LR033  
458 to T.N., by MEXT/JSPS KAKENHI Grants to T.N. (Nos. JP15H04364 and  
459 JP26103527) and to Y.S. (Nos. JP15K07034 and JP19H05404). Y.K. was  
460 recipient of JSPS Fellowship for Japan Junior Scientists (15J12274) and the  
461 Uehara Memorial Foundation postdoctoral fellow.

## 462 **Author Contributions:**

463 Y.K. and Y.S. designed research; Y.K. performed research and collected data in  
464 R.B. and T.N. labs; T. I. collected a tethered cell data, M.Y., R.I, Y. V. M., and  
465 K.G helped for genetics and strain; T.N and Y.S developed the framework for  
466 analysis; Y.K., Y.V.M and Y.S. wrote the paper.

## 467 **Conflict of interest**

468 The authors declare no competing financial interests.

469

## 470 **References**

- 471 [1] Berg, H. C. (2003) *Annu Rev Biochem* **72**:19-54
- 472 [2] Miyata, M., Robinson, R. C., Uyeda, T. Q. P., *et al.* (2020) *Genes Cells* **25**:6-21
- 473 [3] Sowa, Y. & Berry, R. M. (2008) *Q Rev Biophys* **41**:103-132
- 474 [4] Berg, H. C. & Anderson, R. A. (1973) *Nature* **245**:380-382
- 475 [5] Silverman, M. & Simon, M. (1974) *Nature* **249**:73-74
- 476 [6] Berg, H. C. & Brown, D. A. (1972) *Nature* **239**:500-504
- 477 [7] Turner, L., Ryu, W. S., & Berg, H. C. (2000) *J Bacteriol* **182**:2793-2801
- 478 [8] Son, K., Guasto, J. S., & Stocker, R. (2013) *Nature Physics* **9**:494
- 479 [9] Xie, L., Altindal, T., Chattopadhyay, S., *et al.* (2011) *Proc Natl Acad Sci U S A*  
480 **108**:2246-2251
- 481 [10] Kinoshita, Y., Kikuchi, Y., Mikami, N., *et al.* (2018) *ISME J* **12**:838-848
- 482 [11] Kuhn, M. J., Schmidt, F. K., Eckhardt, B., *et al.* (2017) *Proc Natl Acad Sci U S A*  
483 **114**:6340-6345
- 484 [12] Dunne, K. A., Chaudhuri, R. R., Rossiter, A. E., *et al.* (2017) *Microb Genom*  
485 **3**:mgen000106
- 486 [13] Khetrpal, V., Mehershahi, K. S., & Chen, S. L. (2017) *Genome Announc* **5**:
- 487 [14] Bachmann, B. J. (1972) *Bacteriol Rev* **36**:525-557
- 488 [15] Adler, J. (1973) *J Gen Microbiol* **74**:77-91
- 489 [16] Hazelbauer, G. L., Mesibov, R. E., & Adler, J. (1969) *Proc Natl Acad Sci U S A*  
490 **64**:1300-1307
- 491 [17] Barker, C. S., Pruss, B. M., & Matsumura, P. (2004) *J Bacteriol* **186**:7529-7537
- 492 [18] Cremer, J., Honda, T., Tang, Y., *et al.* (2019) *Nature*
- 493 [19] Datsenko, K. A. & Wanner, B. L. (2000) *Proc Natl Acad Sci U S A*  
494 **97**:6640-6645
- 495 [20] Bochner, B. R., Huang, H. C., Schieven, G. L., *et al.* (1980) *J Bacteriol*  
496 **143**:926-933
- 497 [21] Kinoshita, Y. & Nishizaka, T. (2018) *Biophys Physicobiol* **15**:121-128
- 498 [22] Kinoshita, Y., Uchida, N., Nakane, D., *et al.* (2016) *Nat Microbiol* **1**:16148
- 499 [23] Kinoshita, Y., Miyata, M., & Nishizaka, T. (2018) *Sci Rep* **8**:11513
- 500 [24] Kinoshita, Y., Nakane, D., Sugawa, M., *et al.* (2014) *Proc Natl Acad Sci U S A*  
501 **111**:8601-8606
- 502 [25] Nikata, T., Sumida, K., Kato, J., *et al.* (1992) *Appl Environ Microbiol*  
503 **58**:2250-2254
- 504 [26] Ishida, T., Ito, R., Clark, J., *et al.* (2019) *Mol Microbiol* **111**:1689-1699
- 505 [27] Taute, K. M., Gude, S., Tans, S. J., *et al.* (2015) *Nat Commun* **6**:8776

- 506 [28] Wolfe, A. J. & Berg, H. C. (1989) *Proc Natl Acad Sci U S A* **86**:6973-6977
- 507 [29] Macnab, R. M. & Ornston, M. K. (1977) *J Mol Biol* **112**:1-30
- 508 [30] Kamiya, R., Hotani, H., & Asakura, S. (1982) *Symp Soc Exp Biol* **35**:53-76
- 509 [31] Magariyama, Y., Sugiyama, S., Muramoto, K., *et al.* (1995) *Biophys J*  
510 **69**:2154-2162
- 511 [32] Hotani, H. (1982) *J Mol Biol* **156**:791-806
- 512 [33] Kitao, A., Yonekura, K., Maki-Yonekura, S., *et al.* (2006) *Proc Natl Acad Sci U*  
513 *S A* **103**:4894-4899
- 514 [34] Calladine, C. R. (1975) *Nature* **255**:121-124
- 515 [35] Calladine, C. R., Luisi, B. F., & Pratap, J. V. (2013) *J Mol Biol* **425**:914-928
- 516 [36] Darnton, N. C. & Berg, H. C. (2007) *Biophys J* **92**:2230-2236
- 517 [37] Hayashi, F., Tomaru, H., Furukawa, E., *et al.* (2013) *J Bacteriol* **195**:3503-3513
- 518 [38] Wang, C., Lunelli, M., Zscheschang, E., *et al.* (2019) *Mol Microbiol*  
519 **112**:1519-1530
- 520 [39] Wang, W., Jiang, Z., Westermann, M., *et al.* (2012) *J Bacteriol* **194**:5856-5863
- 521 [40] Turner, L., Zhang, R., Darnton, N. C., *et al.* (2010) *J Bacteriol* **192**:3259-3267
- 522 [41] Mannik, J., Driessen, R., Galajda, P., *et al.* (2009) *Proc Natl Acad Sci U S A*  
523 **106**:14861-14866
- 524 [42] Maki-Yonekura, S., Yonekura, K., & Namba, K. (2010) *Nat Struct Mol Biol*  
525 **17**:417-422
- 526 [43] Wang, F., Burrage, A. M., Postel, S., *et al.* (2017) *Nat Commun* **8**:960
- 527 [44] Yoshioka, K., Aizawa, S., & Yamaguchi, S. (1995) *J Bacteriol* **177**:1090-1093
- 528 [45] Kanto, S., Okino, H., Aizawa, S., *et al.* (1991) *J Mol Biol* **219**:471-480
- 529 [46] Cisneros, L., Dombrowski, C., Goldstein, R. E., *et al.* (2006) *Phys Rev E Stat*  
530 *Nonlin Soft Matter Phys* **73**:030901
- 531 [47] Fujii, M., Shibata, S., & Aizawa, S. (2008) *J Mol Biol* **379**:273-283
- 532 [48] Taguchi, F., Shibata, S., Suzuki, T., *et al.* (2008) *J Bacteriol* **190**:764-768
- 533 [49] Armitage, J. P. & Macnab, R. M. (1987) *J Bacteriol* **169**:514-518
- 534 [50] Hintsche, M., Waljor, V., Grossmann, R., *et al.* (2017) *Sci Rep* **7**:16771
- 535 [51] Constantino, M. A., Jabbarzadeh, M., Fu, H. C., *et al.* (2018) *Sci Rep* **8**:14415
- 536 [52] Murat, D., Herisse, M., Espinosa, L., *et al.* (2015) *J Bacteriol* **197**:3275-3282
- 537 [53] Kuhn, M. J., Schmidt, F. K., Farthing, N. E., *et al.* (2018) *Nat Commun* **9**:5369
- 538 [54] Echazarreta, M. A., Kepple, J. L., Yen, L. H., *et al.* (2018) *J Bacteriol* **200**:
- 539 [55] Faulds-Pain, A., Birchall, C., Aldridge, C., *et al.* (2011) *J Bacteriol*  
540 **193**:2695-2707
- 541 [56] Wu, L., Wang, J., Tang, P., *et al.* (2011) *PLoS One* **6**:e21479



- 542 [57] Kojima, M., Kubo, R., Yakushi, T., *et al.* (2007) *Mol Microbiol* **64**:57-67
- 543 [58] Liu, B., Gulino, M., Morse, M., *et al.* (2014) *Proc Natl Acad Sci U S A*  
544 **111**:11252-11256
- 545 [59] Mohari, B., Licata, N. A., Kysela, D. T., *et al.* (2015) *MBio* **6**:e00005
- 546 [60] Sporing, I., Martinez, V. A., Hotz, C., *et al.* (2018) *PLoS Biol* **16**:e2006989
- 547 [61] Andersen-Nissen, E., Smith, K. D., Strobe, K. L., *et al.* (2005) *Proc Natl Acad*  
548 *Sci U S A* **102**:9247-9252
- 549 [62] Smith, K. D., Andersen-Nissen, E., Hayashi, F., *et al.* (2003) *Nat Immunol*  
550 **4**:1247-1253
- 551 [63] Samuel, A. D., Pitta, T. P., Ryu, W. S., *et al.* (1999) *Proc Natl Acad Sci U S A*  
552 **96**:9863-9866
- 553 [64] Schade, S. Z., Adler, J., & Ris, H. (1967) *J Virol* **1**:599-609
- 554 [65] Friedlander, R. S., Vlamakis, H., Kim, P., *et al.* (2013) *Proc Natl Acad Sci U S A*  
555 **110**:5624-5629
- 556 [66] Koo, H., Allan, R. N., Howlin, R. P., *et al.* (2017) *Nat Rev Microbiol* **15**:740-755
- 557 [67] Wood, T. K., Gonzalez Barrios, A. F., Herzberg, M., *et al.* (2006) *Appl Microbiol*  
558 *Biotechnol* **72**:361-367
- 559
- 560
- 561

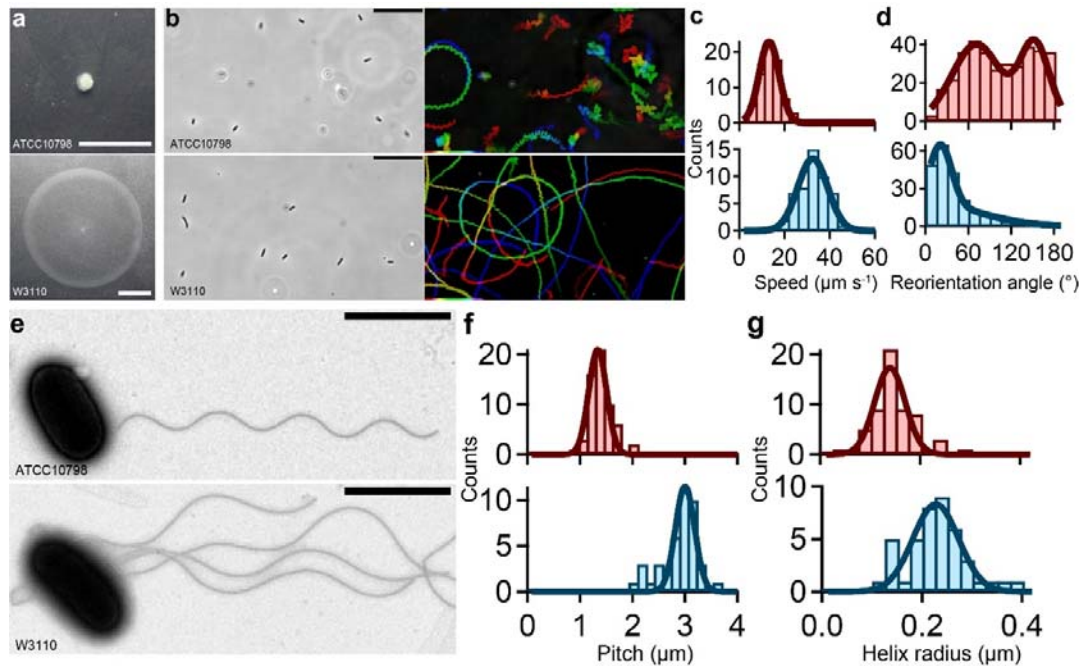

562

563 **Figure 1. Characterization of swimming motility and structural parameters**  
 564 **of ATCC10798 and W3110**

565 (a) Motilities of *E. coli* ATCC10798 and *E. coli* W3110 cells on the 0.25 % (wt/vol)  
 566 soft-agar plates at 30 °C for 7 h. Scale bar, 1 cm. (b) *Left*. Phase-contrast images.  
 567 Scale bar, 20  $\mu\text{m}$ . *Right*. Sequential phase-contrast images taken at 50-ms  
 568 intervals throughout 10 s were integrated with the intermittent color code “red  $\rightarrow$   
 569 yellow  $\rightarrow$  green  $\rightarrow$  cyan  $\rightarrow$  blue.” (c) Histograms of the swimming speed of  
 570 ATCC 10798 (*top*) and W3110 (*bottom*). The solid green lines represent the  
 571 Gaussian fitting, where the peaks and SDs are  $13.2 \pm 4.4 \mu\text{m s}^{-1}$  in ATCC10798  
 572 ( $n = 70$ ) and  $32.5 \pm 6.6 \mu\text{m s}^{-1}$  in W3110 ( $n = 50$ ). (d) Histogram of the  
 573 reorientation angles. The peaks and SD were  $70 \pm 31$  degrees and  $151 \pm 23$   
 574 degrees in ATCC10798 ( $n = 354$ ) and  $34 \pm 13$  degrees in W3110 ( $n = 119$ ). (e)  
 575 Electron micrographs of *E. coli* cells. Scale bars, 2  $\mu\text{m}$ . (f) Histograms of the  
 576 pitch. The solid lines represent the Gaussian fitting, where the peaks and SDs

577 are  $1.3 \pm 0.2 \mu\text{m}$  in ATCC10798 ( $n = 59$ ) and  $3.0 \pm 0.2 \mu\text{m}$  in W3110 ( $n = 41$ ). (g)

578 Histograms of the helix radius. The peaks and SDs are  $0.14 \pm 0.03 \mu\text{m}$  in

579 ATCC10798 ( $n = 59$ ) and  $0.23 \pm 0.05 \mu\text{m}$  in W3110 ( $n = 42$ ).

580

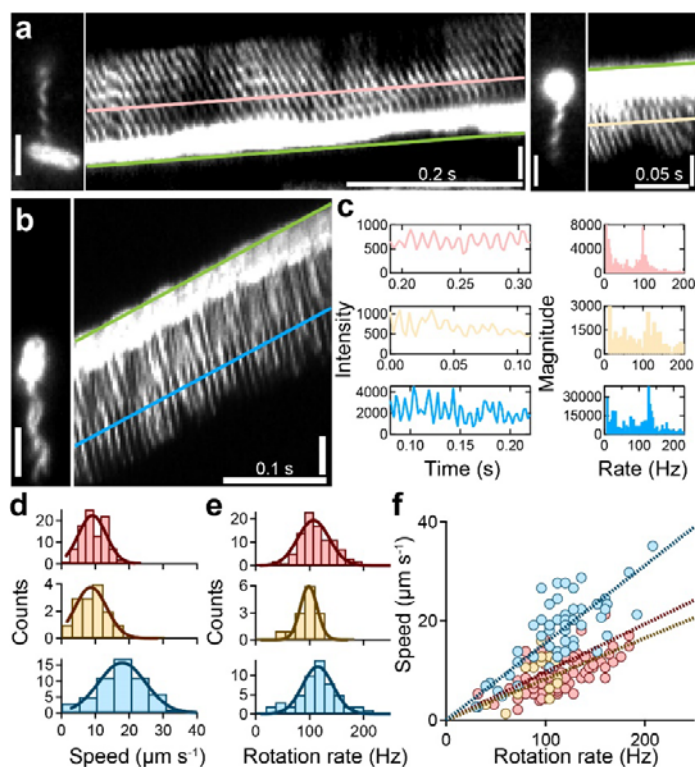

581 **Figure 2. Visualization of forward and backward movements in ATCC10798**

582 (a) Micrographs and kymographs of ATCC10798 cells during backward  
 583 swimming (*left*) and forward swimming (*right*). The green line drawn at the tip of  
 584 the cell enabled quantification of the swimming speed of the cell. The pink and  
 585 blue lines were drawn on the signal of flagella, where the slopes were the same  
 586 as that of a green line. Each intensity change indicated in Fig. 2c *left*. Scale bar,  
 587 2  $\mu\text{m}$ . (b) Typical example of a run in W3110. Scale bar, 2  $\mu\text{m}$ . (c) *Left*. The  
 588 intensity changes along the flagellar filaments, whose each color corresponds to  
 589 Fig. 2a and b. *Right*: The frequency analysis by a Fourier transform. The peaks  
 590 in backward, forward swimming of ATCC1078 and run of W3110 were 94, 108  
 591 and 124 Hz, respectively. (d) Histograms of swimming speed of backward (*top*),  
 592 forward (*middle*) in ATCC10798, and run in W3110 (*bottom*). The solid lines

593 represent the Gaussian fitting, where the peaks and SDs are  $9.1 \pm 4.1 \mu\text{m s}^{-1}$   
594 during backward swimming ( $n = 96$ ),  $8.7 \pm 4.7 \mu\text{m s}^{-1}$  during forward swimming  
595 ( $n = 14$ ), and  $17.9 \pm 6.9 \mu\text{m s}^{-1}$  during run ( $n = 54$ ). (e) Histograms of the flagellar  
596 rotation rate. The peaks and SDs are  $107.2 \pm 29.1 \text{ Hz}$  during backward  
597 swimming,  $98.4 \pm 15.7 \text{ Hz}$  during forward swimming, and  $115.1 \pm 28.1 \text{ Hz}$  during  
598 run. (f) Relationship between swimming speed and rotation rate. Each color  
599 corresponds to Fig. 2d and e. Dashed lines represent a linear fitting, with slopes  
600 of  $0.083 \mu\text{m}$  per revolution during backward swimming,  $0.097 \mu\text{m}$  per revolution  
601 during forward swimming, and  $0.156 \mu\text{m}$  per revolution during run.

602

603

604

605

606

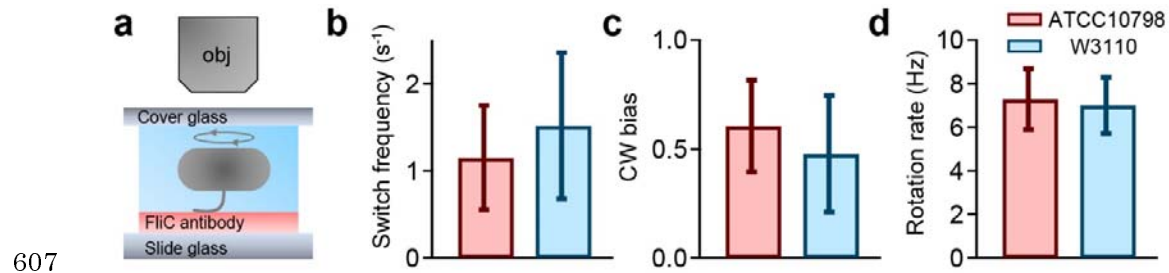

607

### 608 **Figure 3. Quantification of switching behavior by tethered-cell assay**

609 (a) Schematics of tethered-cell assay. Note that an upright microscopy is used in  
610 our measurement, meaning that the rotational direction of the motor is clockwise  
611 in the case of cell body rotating clockwise on the camera plane, vice versa. (b)  
612 Switching frequency of ATCC10798 and W3110 for 10 sec. The average and SD  
613 were  $1.15 \pm 0.60 \text{ s}^{-1}$  in ATCC10798 ( $n = 99$ ) and  $1.52 \pm 0.84 \text{ s}^{-1}$  in W3110 ( $n =$   
614  $53$ ). (c) CW bias ( $\text{Time}_{\text{CW}}/\text{Time}_{\text{Total}}$ ). The average and SD were  $0.61 \pm 0.21$  in  
615 ATCC10798 ( $n = 99$ ) and  $0.48 \pm 0.27$  in W3110 ( $n = 53$ ). (d) Rotation rates. The  
616 average and SD were  $7.3 \pm 1.4 \text{ Hz}$  in ATCC10798 ( $n = 99$ ) and  $7.0 \pm 1.3 \text{ Hz}$  in  
617 W3110 ( $n = 53$ ,  $P = 0.1864 > 0.05$  by  $t$ -test).

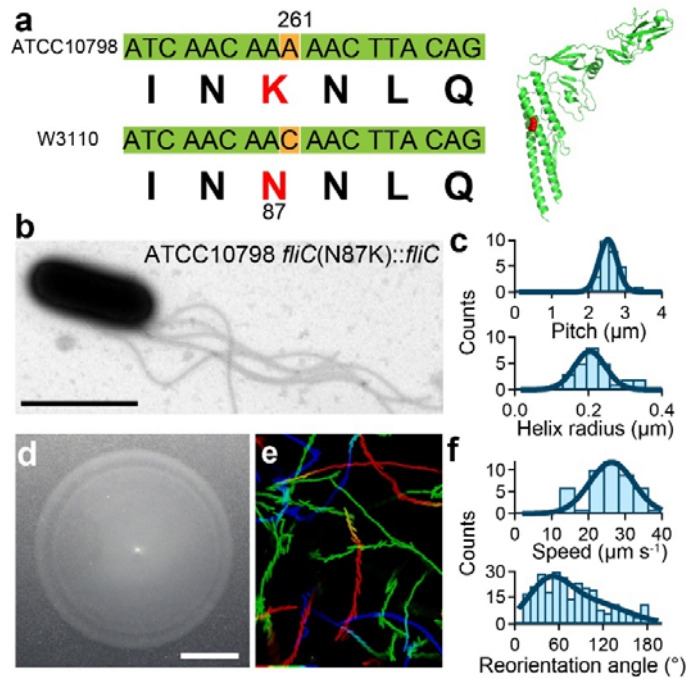

618

619 **Figure 4. FliC(N87K) substitution alter flagellar shape and swimming mode**

620 (a) *Left:* The gene sequence of the *fliC*. *Right:* The crystal structure of FliC (PDB:

621 11O1). The red residue represents N87 molecule. (b) Electron micrograph of

622 [*fliC(N87K)::fliC*] cells. Scale bars, 2  $\mu\text{m}$ . (c) Histograms of the pitch (*top*,  $2.5 \pm$

623  $0.2 \mu\text{m}$ ;  $n = 27$ ) and the helix radius (*bottom*,  $0.20 \pm 0.04 \mu\text{m}$ ,  $n = 27$ ).

624 Motilities on a 0.25 % (wt/vol) soft-agar plates at 30°C for 7 h. Scale bar, 1 cm.

625 (e) Swimming traces at 150-ms intervals for 15 s. The intermittent color code

626 indicated the time course from red to blue. Area,  $68.6 \mu\text{m} \times 85.9 \mu\text{m}$ . (f)

627 Histograms of the swimming speed (*top*,  $26.3 \pm 6.0 \mu\text{m s}^{-1}$ ,  $n = 45$ ) and the

628 reorientation angles (*bottom*,  $46 \pm 28$  degrees,  $n = 269$ ).

629

630

631

632

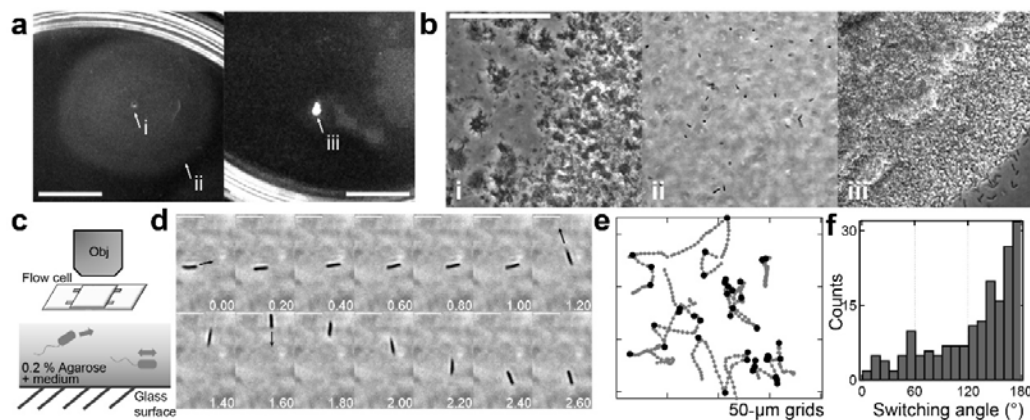

633

634 **Figure 5. Swimming motility on 0.2 % agarose**

635 (a and b) Motilities of W3110 cells (*left*) and ATCC10798 (*right*) on a 0.2 %  
636 (wt/vol) soft-agarose plate after incubation at 30 °C for 7 h. The magnified image  
637 at (i-iii) were shown in b. These experiments were conducted in the same plate.  
638 Scale bar, 1 cm (A) and 50  $\mu$ m (b). (c) *Top*: The schematics to observe a  
639 swimming motility of W3110 cells in a 0.2 % soft agarose pad. *Bottom*: W3110  
640 cells could swim in medium containing 0.2 % agarose. (d) Sequential images of  
641 migration in the 0.2 % agarose. Arrows indicate swimming directions after  
642 reversals, where the angle changes were approximately 180 degrees. Scale bar,  
643 5  $\mu$ m. (e) Typical examples of swimming trajectories with turn events. Black dots  
644 denote the time of reversals. Intervals, 20 ms. (f). Histogram of the switching  
645 angle ( $n = 183$ ).

646

647
